# Supplementary material for: Genital—Systemic Chemokine Gradients and the Risk of HIV Acquisition in Women
Source: PubMed Central journal article supplement — J Acquir Immune Defic Syndr. 2017 Feb 14;74(3):318–25. doi: 10.1097/QAI.0000000000001218 (PMC5305292; doi:10.1097/qai.0000000000001218), 2017-02-14
Supplement: qai-74-318-s001.pdf [file qai-74-318-s001.pdf]

## Supplemental Digital Content 1.

Table illustrating the proportion of participants with detectable cytokines in genital and plasma specimens

| Cytokine       | Cervicovaginal lavage (N=107) |                    | Plasma (N=107) |                    |
|----------------|-------------------------------|--------------------|----------------|--------------------|
|                | Lowest                        | Samples            | Lowest         | Samples            |
|                | detected                      | with               | detected       | with               |
|                | concentration                 | detectable         | concentration  | detectable         |
|                | (pg/ml)                       | concentrations (%) | (pg/ml)        | concentrations (%) |
| IL-1 $\alpha$  | 3.46                          | 100                | 7.23           | 12                 |
| IL-1 $\beta$   | 0.03                          | 98                 | 0.01           | 61                 |
| IL-6           | 0.02                          | 100                | 0.01           | 89                 |
| TNF- $\alpha$  | 0.03                          | 100                | 0.56           | 100                |
| GM-CSF         | 0.01                          | 82                 | 0.01           | 100                |
| IL-8           | 3.99                          | 100                | 0.02           | 69                 |
| IP-10          | 3.05                          | 92                 | 15.54          | 100                |
| MCP-1          | 3.35                          | 90                 | 5.92           | 100                |
| MIP-1 $\alpha$ | 3.30                          | 32                 | 0.42           | 64                 |
| MIP-1 $\beta$  | 0.21                          | 59                 | 5.13           | 93                 |
| IL-7           | 0.03                          | 57                 | 0.01           | 31                 |
| IL-10          | 0.02                          | 82                 | 0.48           | 44                 |

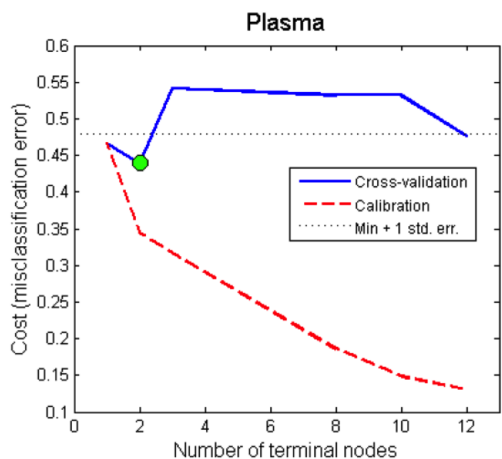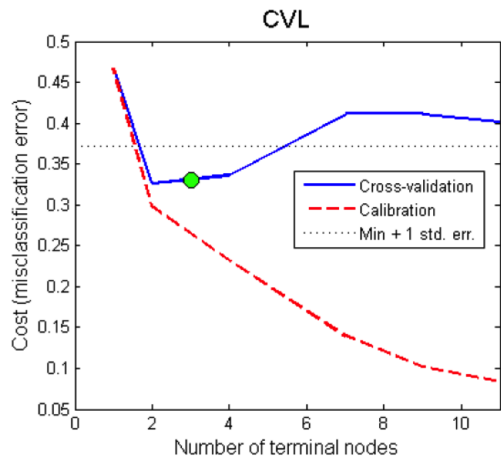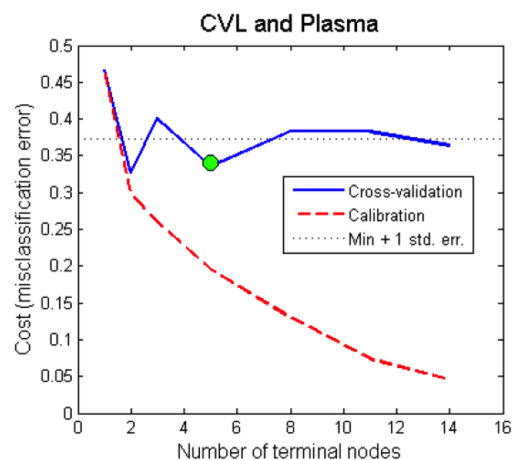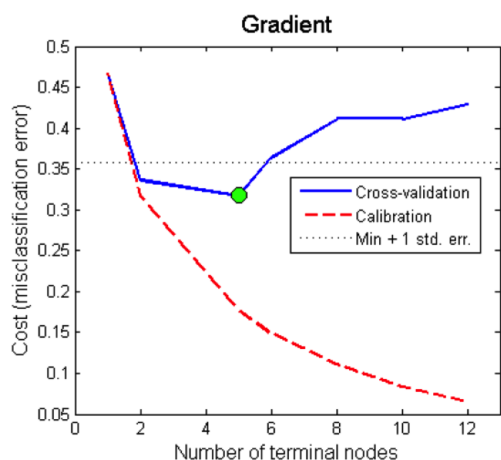

**Supplemental Digital Content 2.** The figure illustrates the pruning of decision trees. For each tree, pruning was conducted by determining the number of terminal nodes that minimized both cross validation (blue line) and calibration error (red line). A green circle depicts the point chosen as the optimal tree.
